# Supplementary material
Source: HighWire-hosted journal article supplement (https://bmjopen.bmj.com/content/13/6/e067049)
Supplement: inline-supplementary-material-1 [file inline-supplementary-material-1.pdf]

## Supplementary file: Health service unit costs and resource costs

|                                                                            | Unit cost | Intervention n=501  |               | Control n=515       |               |
|----------------------------------------------------------------------------|-----------|---------------------|---------------|---------------------|---------------|
|                                                                            |           | Number of occasions | Resource cost | Number of occasions | Resource cost |
| <b>Health service use for mother's health since discharge after birth</b>  |           |                     |               |                     |               |
| Mother presentations to hospital                                           |           |                     |               |                     |               |
| Inpatient admission                                                        |           |                     |               |                     |               |
| <i>Same day</i>                                                            | \$819     | 3                   | \$2,457       | 3                   | \$2,457       |
| <i>1-7 days</i>                                                            | \$3,657   | 24                  | \$87,768      | 14                  | \$51,198      |
| <i>8 days or more</i>                                                      | \$5,024   | 2                   | \$10,048      | 1                   | \$5,024       |
| Emergency dept. admitted >4hours                                           | \$1078    | 47                  | \$50,666      | 38                  | \$40,964      |
| Emergency dept. non-admitted <4hours                                       | \$712     | 42                  | \$29,904      | 43                  | \$30,616      |
| Outpatients visit                                                          | \$190     | 144                 | \$27,360      | 135                 | \$25,650      |
| Mother non-hospital health service visits                                  |           |                     |               |                     |               |
| GP                                                                         | \$39.10   | 594                 | \$23,225.40   | 590                 | \$23,069.00   |
| Allied Health (Physiotherapy, Osteopathy, Chiropractor)                    | \$64.80   | 163                 | \$10,562.40   | 203                 | \$13,154.40   |
| Psychologist                                                               | \$103.80  | 62                  | \$6,435.60    | 46                  | \$4,774.80    |
| Specialist Physician                                                       | \$90.35   | 25                  | \$2,258.75    | 33                  | \$2,981.55    |
| <b>Health service use for baby's health since discharge after birth</b>    |           |                     |               |                     |               |
| Infant presentations to hospital                                           |           |                     |               |                     |               |
| Inpatient admission                                                        |           |                     |               |                     |               |
| <i>Same day</i>                                                            | \$3,649   | 4                   | \$14596       | 3                   | \$10947       |
| <i>1-6 days</i>                                                            | \$3,649   | 15                  | \$54735       | 20                  | \$72980       |
| <i>7 days or more</i>                                                      | \$5,150   | 1                   | \$5150        | 1                   | \$5150        |
| Emergency dept. admitted >4hours                                           | \$1078    | 48                  | \$1744        | 48                  | \$51744       |
| Emergency dept. non-admitted <4hours                                       | \$712     | 85                  | \$60520       | 93                  | \$66216       |
| Outpatients visit                                                          | \$447     | 83                  | \$37101       | 131                 | \$58557       |
| Infant non-hospital health service visits                                  |           |                     |               |                     |               |
| GP                                                                         | \$39.10   | 334                 | \$13,059.40   | 406                 | \$15,874.60   |
| Paediatrician                                                              | \$90.35   | 42                  | \$3,794.70    | 56                  | \$5,059.60    |
| <b>Sought help or advice for breastfeeding since discharge after birth</b> |           |                     |               |                     |               |
| Lactation consultant from local council                                    | \$64.80   | 98                  | \$6,350.40    | 111                 | \$7,192.80    |
| Lactation consultant (private)                                             | \$64.80   | 49                  | \$3,175.20    | 42                  | \$2,721.60    |
| Lactation support unit (hospital or community)                             | \$64.80   | 47                  | \$3,045.60    | 30                  | \$1,944.00    |
| ABA Telephone hotline                                                      | \$29.45   | 190                 | \$5,595.50    | 164                 | \$4,829.80    |
| ABA local counsellor                                                       | \$64.80   | 12                  | \$777.60      | 19                  | \$1,231.20    |
| MCHN helpline                                                              | \$29.45   | 29                  | \$854.05      | 40                  | \$1,178.00    |
